# Supplementary material
Source: PubMed Central journal article supplement (PMC1458823)
Supplement: pnas_0600912103_3.pdf [file pnas_0600912103_3.pdf]

**Table 1. CGH probes confirmed by PCR**

|                   | <b>Oligos</b>           | <b>SM41</b> | <b>ZB138</b> | <b>SM1021</b> |
|-------------------|-------------------------|-------------|--------------|---------------|
| <b>Zone 1</b>     | <i>sma0106</i>          | +           | -            | NA            |
|                   | <i>sma0134</i>          | +           | -            | NA            |
|                   | <i>sma0196</i>          | +           | -            | NA            |
|                   | <i>sma0209</i>          | +           | -            | NA            |
|                   | <i>sma0260</i>          | +           | -            | NA            |
|                   | <i>sma0222/223</i>      | +           | -            | NA            |
| <b>Zone 2</b>     | <i>sma0340=WRBA2</i>    | +           | +            | NA            |
|                   | <i>sma0352</i>          | +           | +            | NA            |
|                   | <i>sma0357/359</i>      | +           | +            | NA            |
|                   | <i>sma0374</i>          | +           | +            | NA            |
|                   | <i>sma0429</i>          | +           | +            | NA            |
|                   | <i>sma0466</i>          | +           | +            | NA            |
|                   | <i>sma0512</i>          | +           | +            | NA            |
|                   | <i>sma0537</i>          | +           | +            | NA            |
|                   | <i>sma0551</i>          | +           | +            | NA            |
|                   | <i>sma0574</i>          | +           | +            | NA            |
| <b>Zone 3</b>     | <i>sma0723</i>          | +           | -            | +             |
|                   | <i>sma0731</i>          | +           | -            | NA            |
|                   | <i>sma0745</i>          | +           | -            | NA            |
|                   | <i>sma0751</i>          | +           | -            | NA            |
|                   | <i>sma0754</i>          | +           | -            | NA            |
|                   | <i>sma0757</i>          | +           | -            | NA            |
|                   | <i>sma0759</i>          | -           | -            | +             |
|                   | <i>sma0760</i>          | -           | -            | +             |
|                   | <i>sma0762</i>          | +           | -            | NA            |
|                   | <i>sma0773</i>          | +           | -            | +             |
|                   | <i>ISRM30 (sma0779)</i> | -           | -            | +             |
|                   | <i>sma0811</i>          | +           | -            | +             |
|                   | <i>Sma0814</i>          | +           | -            | +             |
|                   | <i>Sma0815</i>          | +           | -            | +             |
|                   | <i>Sma0822</i>          | +           | -            | +             |
|                   | <i>Sma0825</i>          | +           | -            | +             |
|                   | <i>sma0831</i>          | +           | -            | NA            |
|                   | <i>sma0838</i>          | +           | -            | NA            |
|                   | <i>Sma0841</i>          | +           | -            | +             |
|                   | <i>sma0849</i>          | +           | -            | +             |
|                   | <i>sma0851</i>          | +           | -            | +             |
|                   | <i>sma0852</i>          | +           | -            | +             |
|                   | <i>sma0855</i>          | +           | +            | NA            |
|                   | <i>sma0863</i>          | +           | -            | NA            |
|                   | <i>sma0866</i>          | +           | -            | +             |
|                   | <i>sma0873</i>          | +           | -            | +             |
|                   | <i>sma0875</i>          | +           | -            | +             |
| <i>sma0878</i>    | +                       | +           | +            |               |
| <i>sma0903</i>    | +                       | -           | NA           |               |
| <i>sma0905</i>    | +                       | -           | NA           |               |
| <i>sma0950</i>    | -                       | -           | +            |               |
| <b>Zone 4</b>     | <i>sma1013=actP</i>     | -           | -            | +             |
|                   | <i>sma1076</i>          | -           | -            | +             |
|                   | <i>sma1082</i>          | -           | -            | +             |
|                   | <i>sma1087</i>          | -           | -            | +             |
|                   | <i>sma1104</i>          | -           | -            | +             |
|                   | <i>sma1126</i>          | -           | -            | +             |
| <b>Zone 5</b>     | <i>sma1182</i>          | +           | -            | NA            |
|                   | <i>sma1207</i>          | +           | -            | NA            |
|                   | <i>sma1220</i>          | +           | -            | +             |
|                   | <i>sma1698</i>          | +           | -            | NA            |
|                   | <i>sma1704</i>          | +           | -            | NA            |
| <b>Chromosome</b> | <i>smc01874</i>         | +           | +            | NA            |
|                   | <i>smc01905</i>         | +           | +            | NA            |

The table lists the probes tested by PCR; +, presence; -, absence; NA, not tested. Zones 1-5 refer to the zones described in Fig. 5. Two chromosome-located genes are also included as controls.
