# Supplementary material
Source: PubMed Central journal article supplement (PMC1458823)

bacteria

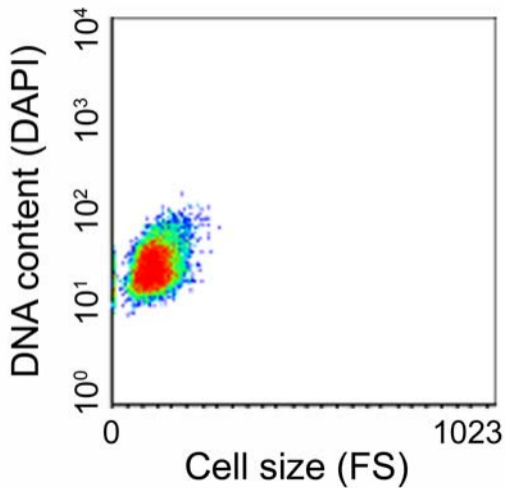

bacteroids

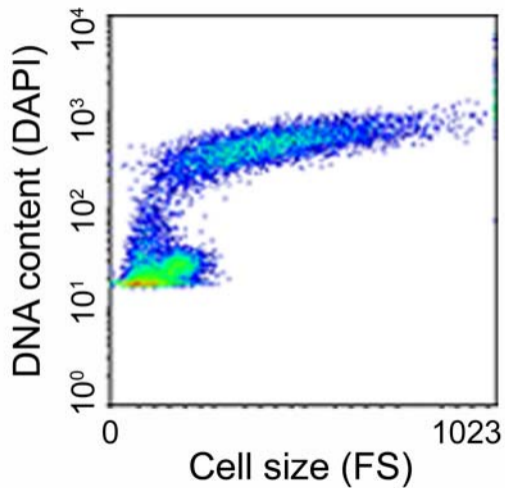

Supplement: pnas_0600912103_1.pdf [file pnas_0600912103_1.pdf]

### CGH: $\log_2(\text{Sm41}/\text{ZB138})$

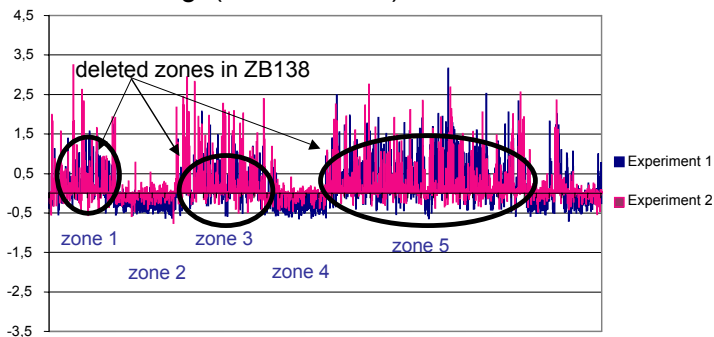

### PCR on ZB138

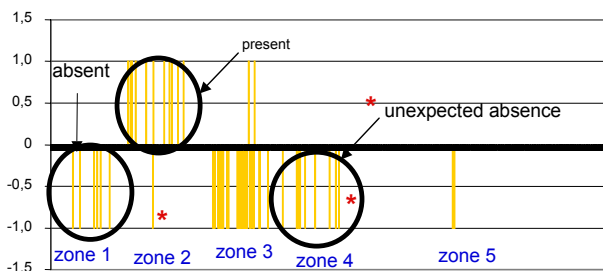

### CGH: $\log_2(\text{Sm1021}/\text{Sm41})$

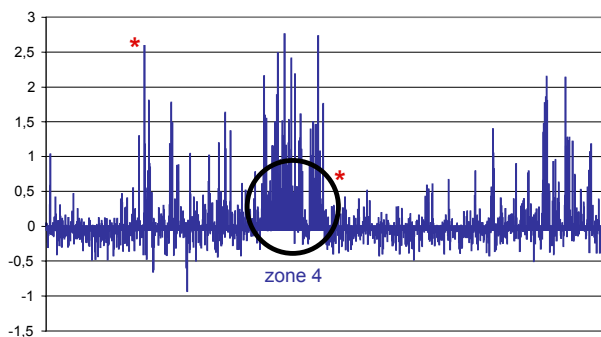

### PCR on Sm41 and Sm1021

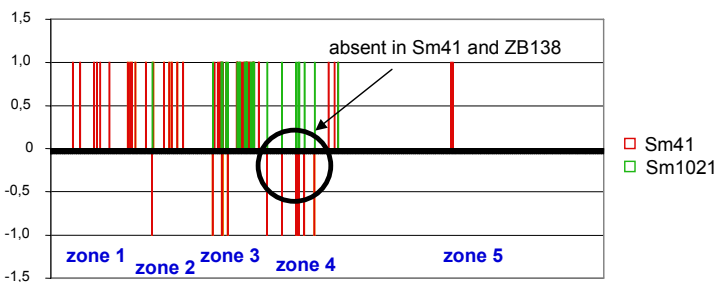

Supplement: pnas_0600912103_2.pdf [file pnas_0600912103_2.pdf]
